# Supplementary material
Source: publisher site journal article supplement (https://www.dovepress.com/article/527083)
Supplement: Supplementary file 1 [file 527083%20supplementary%20materials.docx]

#
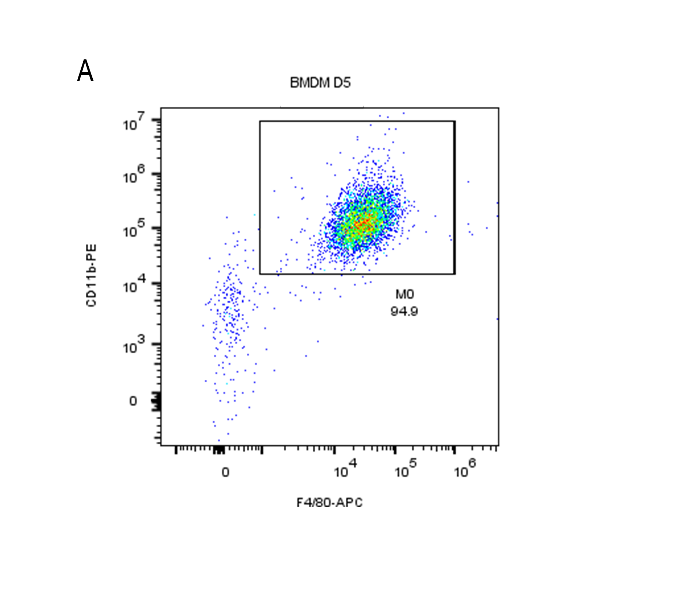


**Figure S1. Maturation of BMDMs after 5 days in culture.**

(A) Flow cytometric analysis of CD11b⁺ and F4/80⁺ cells in BMDMs after 5 days of culture.


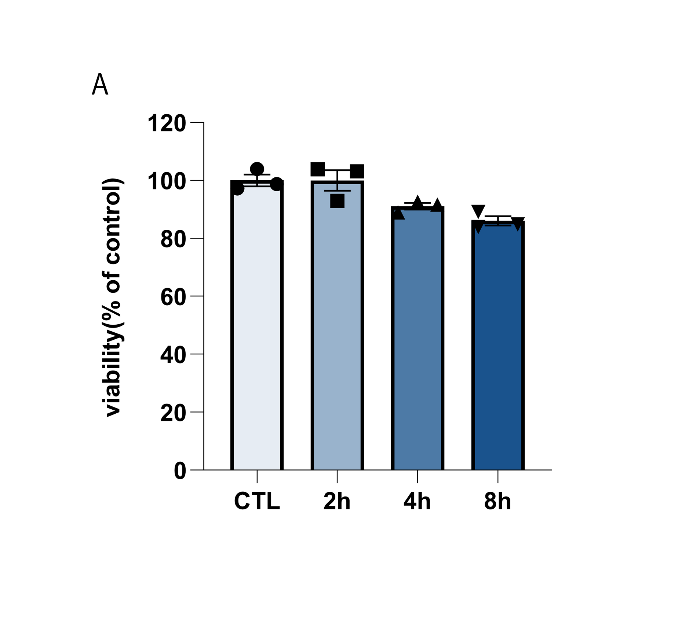


**Figure S2. PM exposure has no significant effect on BMDM viability.**

BMDMs were exposed to PM (120 µg/mL) for 2 h, 4 h, and 8 h.

(A) Cell survival rate at the indicated time points (n = 3).

All results were confirmed in at least three independent experiments, and data are presented as mean ± SD.


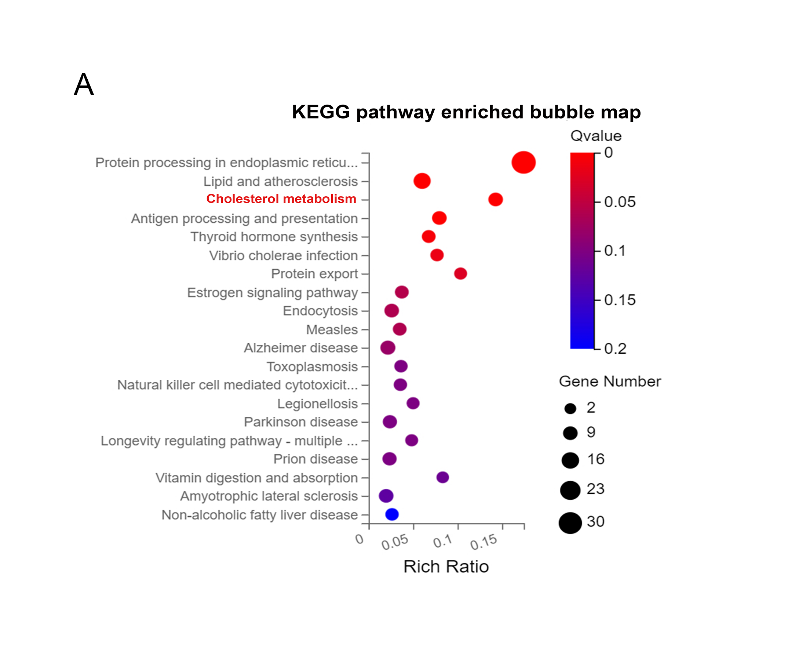


**Figure S3. KEGG pathway enrichment analysis of differentially expressed genes in BMDMs after PM exposure.**

(A) Bubble map showing enriched KEGG pathways, with bubble size representing the number of genes and color indicating Q-value (n=3).


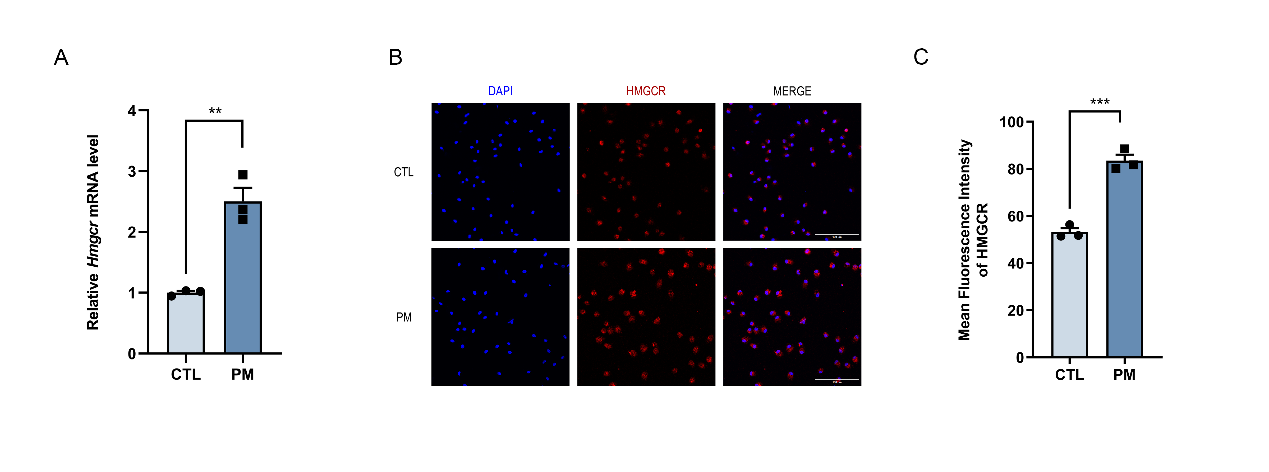


**Figure S4. PM exposure increases HMGCR expression in alveolar macrophages.**

Alveolar macrophages (AMs) were exposed to PM (80 µg/mL) for 6 h.

(A) qPCR analysis of *Hmgcr* mRNA expression (n = 3).

(B) Representative immunofluorescence images showing HMGCR (red) and DAPI (blue).

(C) Quantification of mean fluorescence intensity of HMGCR (n = 3).

All results were confirmed in at least three independent experiments, and data are presented as mean ± SD. **p < 0.01, ***p < 0.001


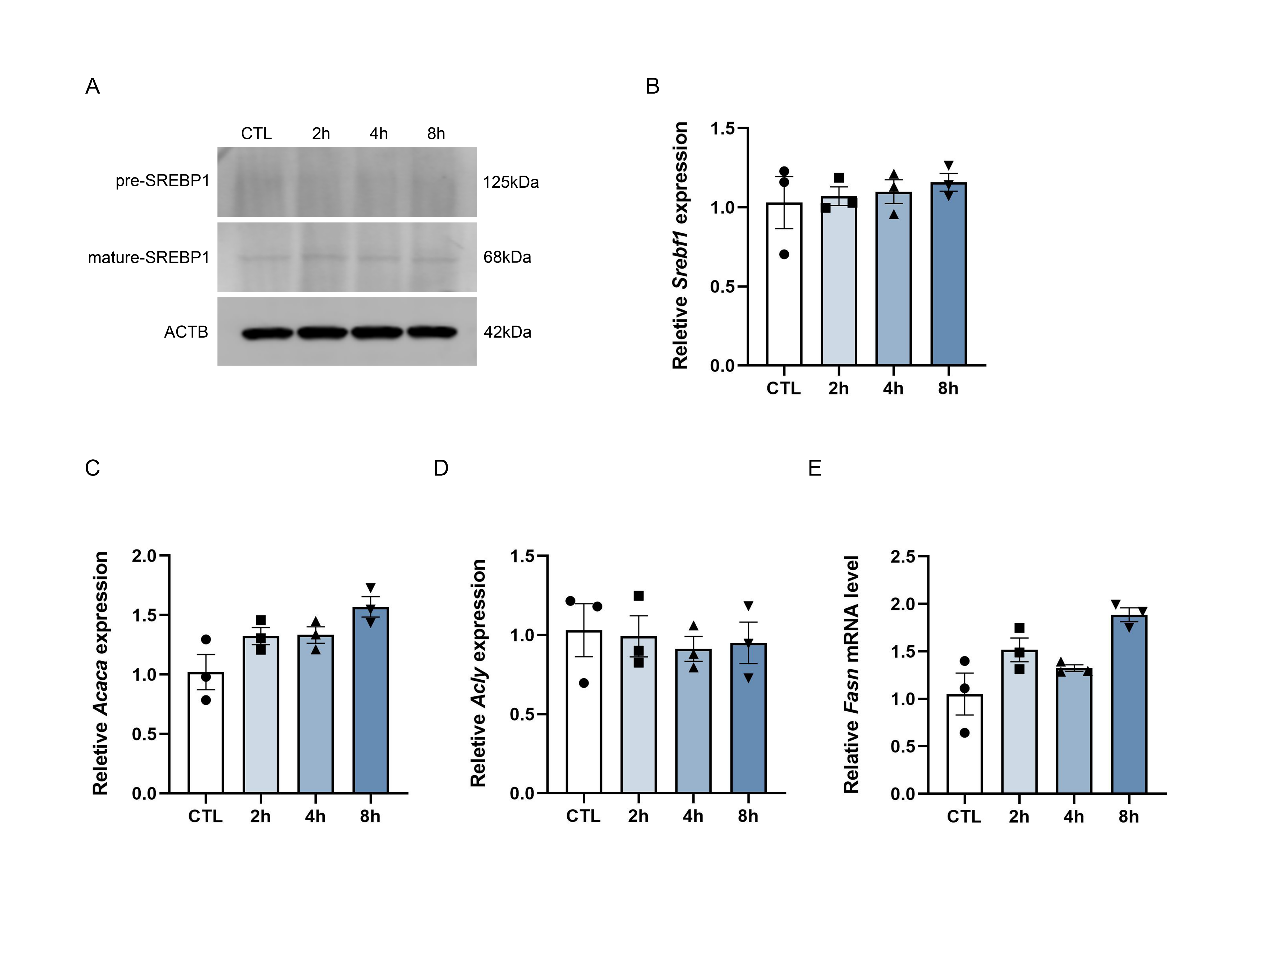


**Figure S5. PM exposure does not influence the SREBP1-mediated fatty acid biosynthetic pathway in macrophages**

BMDMs were exposed to PM (120 µg/mL) for 2, 4, and 8 h.

(A) WB analysis of precursor (pre-) and mature SREBP1; ACTB as loading control.

(B) qPCR analysis of *Srebf1* mRNA (n = 3).

(C–E) qPCR analysis of *Acaca* (C, n = 3), *Acly* (D, n = 3), and *Fasn* (E, n = 3) mRNA expression at the indicated time points.

All results were confirmed in at least three independent experiments, and data are presented as mean ± SD.


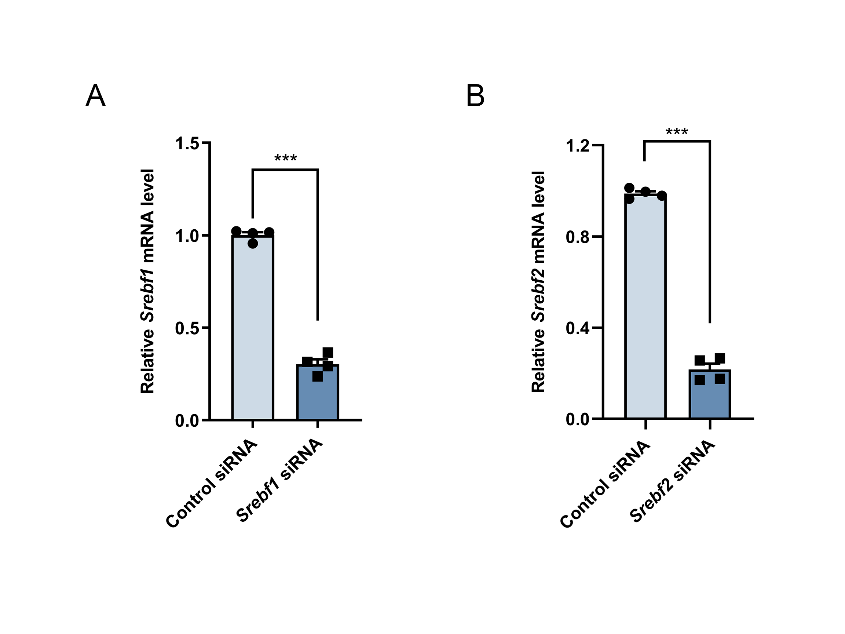


**Figure S6 Validation of Srebf1 and Srebf2 knockdown efficiency in BMDMs.**

(A) qPCR analysis of *Srebf1* mRNA expression after transfection with control siRNA or Srebf1 siRNA (n = 4).

(B) qPCR analysis of *Srebf2* mRNA expression after transfection with control siRNA or Srebf2 siRNA (n = 4).

All results were confirmed in at least three independent experiments, and data are presented as mean ± SD. ***p < 0.001


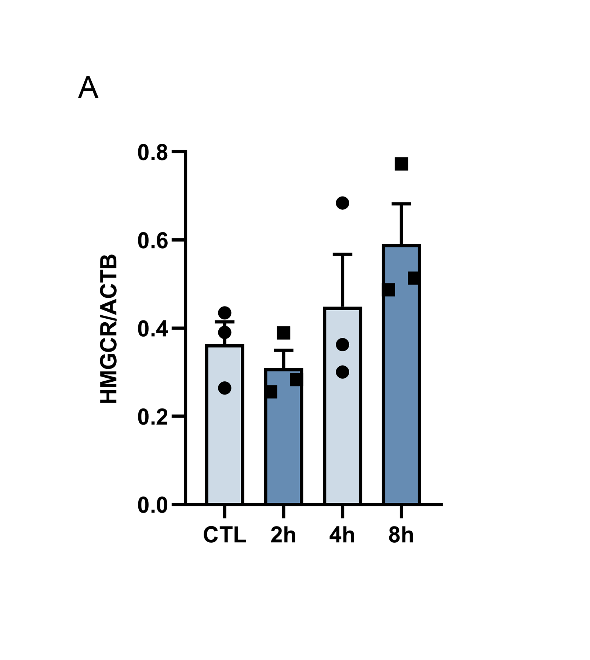


**Figure S7 Quantification of HMGCR protein expression in BMDMs after PM exposure.**

(A) Quantification of HMGCR protein levels normalized to ACTB in BMDMs treated with PM (120 µg/mL) for 2 h, 4 h, and 8 h compared with CTL (n = 3).

All results were confirmed in at least three independent experiments, and data are presented as mean ± SD.


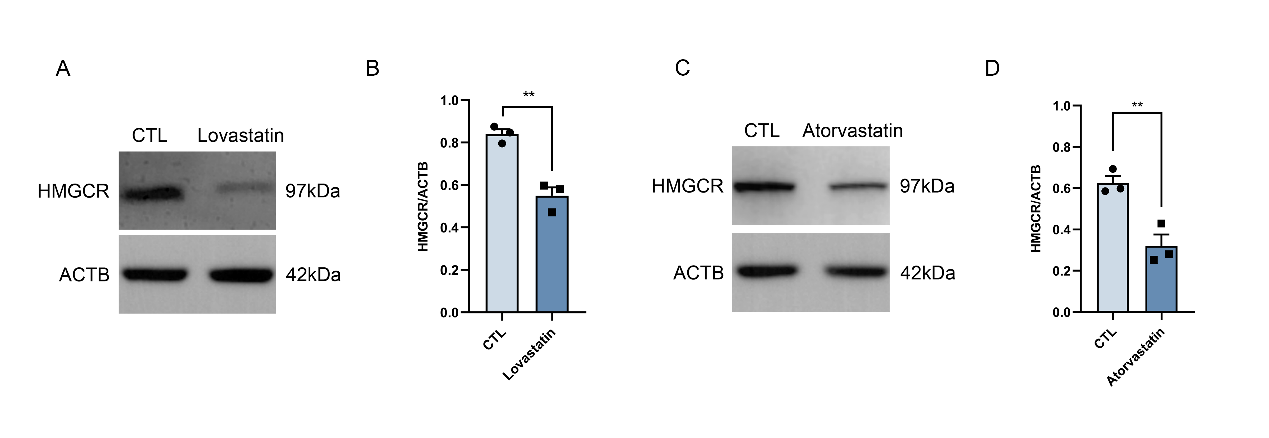


**Figure S8. Lovastatin and Atorvastatin treatment reduces HMGCR protein levels**

BMDMs were treated with lovastatin (20 µM) or atorvastatin (20 µM) for 24h.

(A, B) WB analysis (A) and quantification (B) of HMGCR protein expression following lovastatin treatment, normalized to ACTB (n = 3).

(C, D) WB analysis (C) and quantification (D) of HMGCR protein expression following atorvastatin treatment, normalized to ACTB (n = 3).

Data are representative of three independent experiments and are presented as mean ± SD.**p < 0.01

**Gene List**

| 1 | Protein processing in endoplasmic reticulum | Hyou1 | Pdia4 | Canx | Ddit3 | Eif2ak3 | Sec63 | Pdia3 | Hspa5 |
| --- | --- | --- | --- | --- | --- | --- | --- | --- | --- |
|  |  | Hspa8 | Hsph1 | Hspa1b | Ppp1r15a | Hspa4l | P4hb | Eif2ak2 | Edem1 |
|  |  | Hspa1a | Hsp90b1 | Xbp1 | Atf6 | Sec61a1 | Herpud1 | Dnajc10 | Ero1lb |
|  |  | Derl1 | Dnajb11 | Pdia6 | Ern1 | Dnajb1 | Sil1 |  |  |
| 2 | Lipid and atherosclerosis | Ddit3 | Eif2ak3 | Hspa5 | Hspa8 | Hspa1b | Hspa4 | Ldlr | Hspa1a |
|  |  | Hsp90b1 | Xbp1 | Atf6 | Apob | Ern1 |  |  |  |
| 3 | Cholesterol metabolism | Pcsk9 | Apoe | Lrp2 | Ldlr | Lrp1 | Apob | Abcg8 |  |
| 4 | Antigen processing and presentation | Canx | Pdia3 | Hspa5 | Hspa8 | Hspa1b | Hspa4 | Hspa1a |  |
| 5 | Thyroid hormone synthesis | Pdia4 | Canx | Lrp2 | Hspa5 | Hsp90b1 |  |  |  |
| 6 | Vibrio cholerae infection | Pdia4 | Sec61a1 | Kdelr2 | Kdelr1 |  |  |  |  |
| 7 | Protein export | Sec63 | Hspa5 | Sec61a1 |  |  |  |  |  |
| 8 | Estrogen signaling pathway | Grb2 | Hspa8 | Hspa1b | Hspa1a | Hsp90b1 |  |  |  |
| 9 | Endocytosis | Capza1 | Dab2 | Hspa8 | Hspa1b | Ldlr | Hspa1a | Ap2b1 |  |
| 10 | Measles | Eif2ak3 | Hspa8 | Hspa1b | Eif2ak2 | Hspa1a |  |  |  |
| 11 | Alzheimer disease | Apoe | Ddit3 | Eif2ak3 | Lrp1 | Eif2ak2 | Xbp1 | Atf6 | Ern1 |
| 12 | Toxoplasmosis | Hspa8 | Hspa1b | Ldlr | Hspa1a |  |  |  |  |
| 13 | Natural killer cell mediated cytotoxicit | Grb2 | Ptk2b | Syk | Tyrobp |  |  |  |  |
| 14 | Legionellosis | Hspa8 | Hspa1b | Hspa1a |  |  |  |  |  |
| 15 | Parkinson disease | Ddit3 | Eif2ak3 | Hspa5 | Xbp1 | Atf6 | Ern1 |  |  |
| 16 | Longevity regulating pathway-multiple | Hspa8 | Hspa1b | Hspa1a |  |  |  |  |  |
| 17 | Prion disease | Ddit3 | Eif2ak3 | Hspa5 | Hspa8 | Hspa1b | Hspa1a |  |  |
| 18 | Vitamin digestion and absorption | Apob | Cubn |  |  |  |  |  |  |
| 19 | Amyotrophic lateral sclerosis | Ddit3 | Eif2ak3 | Hspa5 | Xbp1 | Atf6 | Derl1 | Ern1 |  |
| 20 | Non-alcoholic fatty liver disease | Ddit3 | Eif2ak3 | Xbp1 | Ern1 |  |  |  |  |
